# Supplementary material for: Whole-genome sequencing analysis of semi-supercentenarians
Source: eLife journal article supplement (doi:10.7554/elife.57849), 2021-05-03
Supplement: supp5 [file elife-57849-supp5-v1.pdf]

**Table 5S.** Significant (FDR<0.05) GO pathways involved in longevity identified by iGSEA4GWAS software. The analysis has been performed considering all the annotated common variants in Cohort 1.

| Pathway | Gene Set Name                                                       | P-value | FDR value   |
|---------|---------------------------------------------------------------------|---------|-------------|
| GO      | NUCLEOBASENUCLEOSIDENUCLEOTIDE AND NUCLEIC ACID TRANSPORT           | 0.001   | 1.00E-03    |
| GO      | NEGATIVE REGULATION OF CELL CYCLE                                   | 0.001   | 1.00E-03    |
| GO      | POSITIVE REGULATION OF MULTICELLULAR ORGANISMAL PROCESS             | 0.001   | 1.00E-03    |
| GO      | POSITIVE REGULATION OF DEVELOPMENTAL PROCESS                        | 0.001   | 1.00E-03    |
| GO      | REGULATION OF HEART CONTRACTION                                     | 0.001   | 1.00E-03    |
| GO      | COVALENT CHROMATIN MODIFICATION                                     | 0.001   | 1.00E-03    |
| GO      | GENERATION OF A SIGNAL INVOLVED IN CELL CELL SIGNALING              | 0.001   | 1.00E-03    |
| GO      | PROTEIN PROCESSING                                                  | 0.001   | 1.00E-03    |
| GO      | NEURON DEVELOPMENT                                                  | 0.001   | 1.00E-03    |
| GO      | CENTRAL NERVOUS SYSTEM DEVELOPMENT                                  | 0.001   | 1.00E-03    |
| GO      | NEGATIVE REGULATION OF BIOSYNTHETIC PROCESS                         | 0.001   | 1.00E-03    |
| GO      | LIPID BINDING                                                       | 0.001   | 1.00E-03    |
| GO      | STRUCTURAL MOLECULE ACTIVITY                                        | 0.001   | 1.00E-03    |
| GO      | REGULATION OF SECRETION                                             | 0.001   | 0.001       |
| GO      | NEURITE DEVELOPMENT                                                 | 0.001   | 0.001       |
| GO      | STRIATED MUSCLE DEVELOPMENT                                         | 0.001   | 0.001       |
| GO      | LIPID TRANSPORT                                                     | 0.001   | 0.001       |
| GO      | AXONOGENESIS                                                        | 0.001   | 0.001       |
| GO      | CELLULAR MORPHOGENESIS DURING DIFFERENTIATION                       | 0.001   | 0.001       |
| GO      | SENSORY PERCEPTION                                                  | 0.001   | 0.001       |
| GO      | HISTONE MODIFICATION                                                | 0.001   | 0.001       |
| GO      | NEURON DIFFERENTIATION                                              | 0.001   | 0.001       |
| GO      | NEGATIVE REGULATION OF TRANSLATION                                  | 0.001   | 0.001       |
| GO      | REGULATION OF MULTICELLULAR ORGANISMAL PROCESS                      | 0.001   | 0.001       |
| GO      | HEMATOPOIETIN INTERFERON CLASSD200 DOMAIN CYTOKINE RECEPTOR BINDING | 0.001   | 0.001       |
| GO      | PROTEIN TYROSINE PHOSPHATASE ACTIVITY                               | 0.001   | 0.001       |
| GO      | PHOSPHORIC MONOESTER HYDROLASE ACTIVITY                             | 0.001   | 0.001       |
| GO      | VOLTAGE GATED CHANNEL ACTIVITY                                      | 0.001   | 0.001       |
| GO      | STRUCTURAL CONSTITUENT OF RIBOSOME                                  | 0.001   | 0.001       |
| GO      | PHOSPHORIC ESTER HYDROLASE ACTIVITY                                 | 0.001   | 0.001       |
| GO      | VOLTAGE GATED CATION CHANNEL ACTIVITY                               | 0.001   | 0.001       |
| GO      | CALCIUM CHANNEL ACTIVITY                                            | 0.001   | 0.001       |
| GO      | PHOSPHOPROTEIN PHOSPHATASE ACTIVITY                                 | 0.001   | 0.001       |
| GO      | STRUCTURAL CONSTITUENT OF CYTOSKELETON                              | 0.001   | 0.001       |
| GO      | LIPID TRANSPORTER ACTIVITY                                          | 0.001   | 0.001       |
| GO      | GROWTH FACTOR ACTIVITY                                              | 0.001   | 0.001       |
| GO      | LIPID RAFT                                                          | 0.001   | 0.001       |
| GO      | TRANSPORT VESICLE                                                   | 0.001   | 0.001       |
| GO      | NEGATIVE REGULATION OF CELLULAR PROTEIN METABOLIC PROCESS           | 0.001   | 0.001032258 |
| GO      | REGULATION OF PROTEIN AMINO ACID PHOSPHORYLATION                    | 0.001   | 0.001033333 |
| GO      | MUSCLE DEVELOPMENT                                                  | 0.001   | 0.001033898 |
| GO      | REGULATION OF CELLULAR PROTEIN METABOLIC PROCESS                    | 0.001   | 0.001034483 |
| GO      | SUBSTRATE SPECIFIC CHANNEL ACTIVITY                                 | 0.001   | 0.001035088 |
| GO      | NEGATIVE REGULATION OF CELLULAR BIOSYNTHETIC PROCESS                | 0.001   | 0.001035714 |
| GO      | SKELETAL DEVELOPMENT                                                | 0.001   | 0.001036364 |
| GO      | SKELETAL MUSCLE DEVELOPMENT                                         | 0.001   | 0.001037736 |
| GO      | MONOVALENT INORGANIC CATION TRANSPORT                               | 0.001   | 0.001038462 |
| GO      | POSITIVE REGULATION OF CELL PROLIFERATION                           | 0.001   | 0.001039216 |
| GO      | GATED CHANNEL ACTIVITY                                              | 0.001   | 0.001040816 |
| GO      | ION CHANNEL ACTIVITY                                                | 0.001   | 0.001041667 |
| GO      | NEGATIVE REGULATION OF CELL PROLIFERATION                           | 0.001   | 0.001044118 |
| GO      | PROTEIN HOMODIMERIZATION ACTIVITY                                   | 0.001   | 0.001044776 |
| GO      | AUXILIARY TRANSPORT PROTEIN ACTIVITY                                | 0.001   | 0.001045455 |
| GO      | G PROTEIN COUPLED RECEPTOR ACTIVITY                                 | 0.001   | 0.001046154 |
| GO      | ESTABLISHMENT AND OR MAINTENANCE OF CHROMATIN ARCHITECTURE          | 0.001   | 0.001046875 |
| GO      | CHROMATIN BINDING                                                   | 0.001   | 0.001047619 |
| GO      | CELL CELL ADHESION                                                  | 0.001   | 0.001101449 |
| GO      | CATION CHANNEL ACTIVITY                                             | 0.001   | 0.00115493  |
| GO      | VOLTAGE GATED POTASSIUM CHANNEL ACTIVITY                            | 0.001   | 0.001178082 |
| GO      | POTASSIUM CHANNEL ACTIVITY                                          | 0.001   | 0.001253333 |
| GO      | ONE CARBON COMPOUND METABOLIC PROCESS                               | 0.001   | 0.001289474 |

| Pathway | Gene Set Name                                                         | P-value | FDR value   |
|---------|-----------------------------------------------------------------------|---------|-------------|
| GO      | GENERATION OF NEURONS                                                 | 0.001   | 0.001333333 |
| GO      | LIGAND DEPENDENT NUCLEAR RECEPTOR ACTIVITY                            | 0.001   | 0.001341772 |
| GO      | REGULATION OF CELL CYCLE                                              | 0.001   | 0.001378049 |
| GO      | DIGESTION                                                             | 0.001   | 0.00139759  |
| GO      | CATION TRANSPORT                                                      | 0.001   | 0.001404762 |
| GO      | CHROMATIN MODIFICATION                                                | 0.001   | 0.001406977 |
| GO      | POSITIVE REGULATION OF IMMUNE SYSTEM PROCESS                          | 0.001   | 0.001411765 |
| GO      | POSITIVE REGULATION OF LYMPHOCYTE ACTIVATION                          | 0.001   | 0.001426966 |
| GO      | PHOSPHOLIPID BINDING                                                  | 0.001   | 0.001433333 |
| GO      | GENERATION OF PRECURSOR METABOLITES AND ENERGY                        | 0.001   | 0.001436782 |
| GO      | POSITIVE REGULATION OF CELLULAR COMPONENT ORGANIZATION AND BIOGENESIS | 0.001   | 0.001461539 |
| GO      | METHYLTRANSFERASE ACTIVITY                                            | 0.001   | 0.001489796 |
| GO      | PROTEIN SECRETION                                                     | 0.001   | 0.001494845 |
| GO      | ACTIN CYTOSKELETON                                                    | 0.001   | 0.001505263 |
| GO      | REGULATION OF PROTEIN METABOLIC PROCESS                               | 0.001   | 0.001510638 |
| GO      | PROTEIN C TERMINUS BINDING                                            | 0.001   | 0.001646465 |
| GO      | REGULATION OF PHOSPHORYLATION                                         | 0.001   | 0.00177     |
| GO      | CELL MIGRATION                                                        | 0.001   | 0.001841584 |
| GO      | HUMORAL IMMUNE RESPONSE                                               | 0.001   | 0.001843137 |
| GO      | REGULATION OF CELL ADHESION                                           | 0.001   | 0.001980769 |
| GO      | NEUROGENESIS                                                          | 0.001   | 0.002130841 |
| GO      | LEUKOCYTE ACTIVATION                                                  | 0.001   | 0.002165138 |
| GO      | CELL SURFACE                                                          | 0.001   | 0.002166667 |
| GO      | ADHERENS JUNCTION                                                     | 0.001   | 0.0022      |
| GO      | STRUCTURAL CONSTITUENT OF MUSCLE                                      | 0.001   | 0.002232143 |
| GO      | SECRETION                                                             | 0.003   | 0.002265487 |
| GO      | TRANSFERASE ACTIVITY TRANSFERRING ONE CARBON GROUPS                   | 0.001   | 0.002382609 |
| GO      | POTASSIUM ION TRANSPORT                                               | 0.001   | 0.002394737 |
| GO      | SUGAR BINDING                                                         | 0.002   | 0.002413793 |
| GO      | RHODOPSIN LIKE RECEPTOR ACTIVITY                                      | 0.001   | 0.002416667 |
| GO      | TRANSMEMBRANE RECEPTOR PROTEIN TYROSINE KINASE SIGNALING PATHWAY      | 0.001   | 0.002418803 |
| GO      | BRAIN DEVELOPMENT                                                     | 0.001   | 0.002420168 |
| GO      | CASPASE ACTIVATION                                                    | 0.001   | 0.002423729 |
| GO      | DEVELOPMENT OF PRIMARY SEXUAL CHARACTERISTICS                         | 0.001   | 0.002483607 |
| GO      | NEGATIVE REGULATION OF DEVELOPMENTAL PROCESS                          | 0.001   | 0.002487603 |
| GO      | INTERPHASE                                                            | 0.001   | 0.0025      |
| GO      | NEGATIVE REGULATION OF PROTEIN METABOLIC PROCESS                      | 0.003   | 0.002622047 |
| GO      | METAL ION TRANSMEMBRANE TRANSPORTER ACTIVITY                          | 0.001   | 0.002632    |
| GO      | RESPONSE TO NUTRIENT LEVELS                                           | 0.001   | 0.002634921 |
| GO      | CATION TRANSMEMBRANE TRANSPORTER ACTIVITY                             | 0.001   | 0.003261539 |
| GO      | LYMPHOCYTE DIFFERENTIATION                                            | 0.001   | 0.003389313 |
| GO      | ION TRANSPORT                                                         | 0.001   | 0.00344697  |
| GO      | METAL ION TRANSPORT                                                   | 0.001   | 0.003514925 |
| GO      | REGULATION OF LYMPHOCYTE ACTIVATION                                   | 0.001   | 0.003595588 |
| GO      | TRANSMEMBRANE RECEPTOR PROTEIN TYROSINE KINASE ACTIVITY               | 0.001   | 0.003614815 |
| GO      | CELL CYCLE ARREST GO 0007050                                          | 0.001   | 0.00392029  |
| GO      | ENZYME ACTIVATOR ACTIVITY                                             | 0.001   | 0.004007194 |
| GO      | MOLECULAR ADAPTOR ACTIVITY                                            | 0.001   | 0.004205674 |
| GO      | TRANSCRIPTION ACTIVATOR ACTIVITY                                      | 0.002   | 0.004214285 |
| GO      | NEGATIVE REGULATION OF CELL DIFFERENTIATION                           | 0.001   | 0.004267606 |
| GO      | ANION TRANSMEMBRANE TRANSPORTER ACTIVITY                              | 0.001   | 0.004293706 |
| GO      | CARBOHYDRATE BINDING                                                  | 0.001   | 0.004537931 |
| GO      | CYTOPLASMIC VESICLE                                                   | 0.002   | 0.005226028 |
| GO      | PROTEIN AUTOPROCESSING                                                | 0.001   | 0.005238095 |
| GO      | SERINE TYPE ENDOPEPTIDASE ACTIVITY                                    | 0.004   | 0.005858108 |
| GO      | REGULATION OF BODY FLUID LEVELS                                       | 0.002   | 0.006120805 |
| GO      | POSITIVE REGULATION OF RESPONSE TO STIMULUS                           | 0.001   | 0.006178808 |
| GO      | VESICLE                                                               | 0.002   | 0.006193333 |
| GO      | REGULATION OF CELL DIFFERENTIATION                                    | 0.001   | 0.006611842 |
| GO      | ELECTRON TRANSPORT GO 0006118                                         | 0.003   | 0.007051948 |
| GO      | PROTEIN BINDING BRIDGING                                              | 0.003   | 0.007052288 |
| GO      | LYMPHOCYTE ACTIVATION                                                 | 0.002   | 0.007296775 |
| GO      | NEGATIVE REGULATION OF PROGRAMMED CELL DEATH                          | 0.002   | 0.007358974 |
| GO      | SECOND MESSENGER MEDIATED SIGNALING                                   | 0.003   | 0.007745223 |
| GO      | NEGATIVE REGULATION OF CATALYTIC ACTIVITY                             | 0.003   | 0.008189874 |

| Pathway | Gene Set Name                                                                            | P-value | FDR value   |
|---------|------------------------------------------------------------------------------------------|---------|-------------|
| GO      | REGULATION OF TRANSLATION                                                                | 0.004   | 0.008886793 |
| GO      | PROTEIN TYROSINE KINASE ACTIVITY                                                         | 0.002   | 0.008993789 |
| GO      | TRANSLATION                                                                              | 0.007   | 0.009246914 |
| GO      | NUCLEAR EXPORT                                                                           | 0.002   | 0.009490798 |
| GO      | PROTEIN DOMAIN SPECIFIC BINDING                                                          | 0.001   | 0.009789157 |
| GO      | PROTEIN DIMERIZATION ACTIVITY                                                            | 0.002   | 0.0098      |
| GO      | APOPTOTIC PROGRAM                                                                        | 0.004   | 0.010473054 |
| GO      | CYTOPLASMIC MEMBRANE BOUND VESICLE                                                       | 0.003   | 0.01083432  |
| GO      | POSITIVE REGULATION OF NUCLEOBASENUCLEOSIDENUCLEOTIDE AND NUCLEIC ACID METABOLIC PROCESS | 0.002   | 0.011117647 |
| GO      | POSITIVE REGULATION OF CELL DIFFERENTIATION                                              | 0.001   | 0.011768786 |
| GO      | NEGATIVE REGULATION OF APOPTOSIS                                                         | 0.002   | 0.011770115 |
| GO      | REGULATION OF PROTEIN MODIFICATION PROCESS                                               | 0.002   | 0.011795322 |
| GO      | REGULATION OF IMMUNE SYSTEM PROCESS                                                      | 0.003   | 0.012011299 |
| GO      | EXOCYTOSIS                                                                               | 0.003   | 0.01322472  |
| GO      | CAMP MEDIATED SIGNALING                                                                  | 0.006   | 0.013544444 |
| GO      | ORGAN MORPHOGENESIS                                                                      | 0.003   | 0.013585636 |
| GO      | PROTEIN AMINO ACID DEPHOSPHORYLATION                                                     | 0.002   | 0.014076923 |
| GO      | CYTOSKELETAL PROTEIN BINDING                                                             | 0.004   | 0.014081967 |
| GO      | PROTEIN COMPLEX ASSEMBLY                                                                 | 0.001   | 0.014326086 |
| GO      | RESPONSE TO EXTRACELLULAR STIMULUS                                                       | 0.005   | 0.014424732 |
| GO      | SH3 SH2 ADAPTOR ACTIVITY                                                                 | 0.006   | 0.01502139  |
| GO      | TRANSMEMBRANE RECEPTOR PROTEIN KINASE ACTIVITY                                           | 0.004   | 0.015398936 |
| GO      | PROTEIN AMINO ACID AUTOPHOSPHORYLATION                                                   | 0.002   | 0.015502646 |
| GO      | INTERPHASE OF MITOTIC CELL CYCLE                                                         | 0.003   | 0.01613158  |
| GO      | MAGNESIUM ION BINDING                                                                    | 0.005   | 0.016193718 |
| GO      | PROTEIN OLIGOMERIZATION                                                                  | 0.005   | 0.016380208 |
| GO      | MEMBRANE BOUND VESICLE                                                                   | 0.004   | 0.016466321 |
| GO      | INDUCTION OF APOPTOSIS BY INTRACELLULAR SIGNALS                                          | 0.006   | 0.016726803 |
| GO      | CHROMATIN                                                                                | 0.005   | 0.016866667 |
| GO      | I KAPPAB KINASE NF KAPPAB CASCADE                                                        | 0.004   | 0.017806122 |
| GO      | SERINE HYDROLASE ACTIVITY                                                                | 0.01    | 0.01790863  |
| GO      | CYTOKINE METABOLIC PROCESS                                                               | 0.005   | 0.018530302 |
| GO      | T CELL ACTIVATION                                                                        | 0.005   | 0.01858794  |
| GO      | ELECTRON CARRIER ACTIVITY                                                                | 0.002   | 0.018760001 |
| GO      | POSITIVE REGULATION OF PHOSPHORYLATION                                                   | 0.003   | 0.019059703 |
| GO      | GTPASE ACTIVATOR ACTIVITY                                                                | 0.005   | 0.01920197  |
| GO      | SERINE TYPE PEPTIDASE ACTIVITY                                                           | 0.008   | 0.01920297  |
| GO      | RESPONSE TO WOUNDING                                                                     | 0.004   | 0.019441176 |
| GO      | HOMEOSTATIC PROCESS                                                                      | 0.004   | 0.020731708 |
| GO      | CYTOKINE ACTIVITY                                                                        | 0.007   | 0.020771844 |
| GO      | REGULATION OF T CELL ACTIVATION                                                          | 0.006   | 0.021275362 |
| GO      | HORMONE ACTIVITY                                                                         | 0.007   | 0.021932691 |
| GO      | HEMOSTASIS                                                                               | 0.009   | 0.022105262 |
| GO      | POSITIVE REGULATION OF TRANSCRIPTION                                                     | 0.005   | 0.02235849  |
| GO      | TRANSLATION FACTOR ACTIVITY NUCLEIC ACID BINDING                                         | 0.012   | 0.022436019 |
| GO      | REGULATION OF CYTOKINE BIOSYNTHETIC PROCESS                                              | 0.007   | 0.022497652 |
| GO      | DEPHOSPHORYLATION                                                                        | 0.003   | 0.022878503 |
| GO      | TRANSCRIPTION COFACTOR ACTIVITY                                                          | 0.007   | 0.022995347 |
| GO      | CHROMOSOME ORGANIZATION AND BIOGENESIS                                                   | 0.005   | 0.024709677 |
| GO      | CELL ACTIVATION                                                                          | 0.005   | 0.025192661 |
| GO      | SPHINGOLIPID METABOLIC PROCESS                                                           | 0.003   | 0.025618182 |
| GO      | MICROTUBULE BINDING                                                                      | 0.005   | 0.025689498 |
| GO      | TISSUE DEVELOPMENT                                                                       | 0.006   | 0.02580543  |
| GO      | CYTOKINE PRODUCTION                                                                      | 0.004   | 0.026536034 |
| GO      | ANTI APOPTOSIS                                                                           | 0.008   | 0.02695964  |
| GO      | INFLAMMATORY RESPONSE                                                                    | 0.006   | 0.027125001 |
| GO      | CHROMOSOME SEGREGATION                                                                   | 0.009   | 0.029568888 |
| GO      | RNA POLYMERASE II TRANSCRIPTION FACTOR ACTIVITY                                          | 0.004   | 0.030563878 |
| GO      | REGULATION OF MAP KINASE ACTIVITY                                                        | 0.005   | 0.030881578 |
| GO      | BONE REMODELING                                                                          | 0.01    | 0.031513043 |
| GO      | POSITIVE REGULATION OF CATALYTIC ACTIVITY                                                | 0.008   | 0.032506492 |
| GO      | SYNAPSE                                                                                  | 0.011   | 0.032512933 |
| GO      | POSITIVE REGULATION OF TRANSFERASE ACTIVITY                                              | 0.012   | 0.033068378 |
| GO      | POSITIVE REGULATION OF CASPASE ACTIVITY                                                  | 0.013   | 0.033948936 |
| GO      | LYTIC VACUOLE                                                                            | 0.006   | 0.035405062 |

| Pathway | Gene Set Name                                                        | P-value | FDR value   |
|---------|----------------------------------------------------------------------|---------|-------------|
| GO      | LYSOSOME                                                             | 0.006   | 0.035405062 |
| GO      | GLYCOPROTEIN METABOLIC PROCESS                                       | 0.01    | 0.038836133 |
| GO      | RECEPTOR MEDIATED ENDOCYTOSIS                                        | 0.01    | 0.039230127 |
| GO      | NEGATIVE REGULATION OF GROWTH                                        | 0.012   | 0.04075     |
| GO      | G PROTEIN SIGNALING COUPLED TO CAMP NUCLEOTIDE SECOND MESSENGER      | 0.016   | 0.040800832 |
| GO      | NEGATIVE REGULATION OF TRANSCRIPTION FROM RNA POLYMERASE II PROMOTER | 0.009   | 0.042355374 |
| GO      | ENDOPEPTIDASE ACTIVITY                                               | 0.018   | 0.044094652 |
| GO      | BASEMENT MEMBRANE                                                    | 0.005   | 0.04452049  |
| GO      | EMBRYONIC DEVELOPMENT                                                | 0.012   | 0.044865303 |
| GO      | TUBULIN BINDING                                                      | 0.019   | 0.045465585 |
| GO      | POSITIVE REGULATION OF TRANSCRIPTION FROM RNA POLYMERASE II PROMOTER | 0.012   | 0.046798386 |
| GO      | WOUND HEALING                                                        | 0.016   | 0.04945783  |
