# Supplementary material for: Whole-genome sequencing analysis of semi-supercentenarians
Source: eLife journal article supplement (doi:10.7554/elife.57849), 2021-05-03
Supplement: supp14 [file elife-57849-supp14-v1.pdf]

**Table 14S.** Logistic regression calculated considering genetic risk score for each individual for Alzheimer diseases, cancer (breast, colon, lung, pancreatic, prostate), coronary disease, stroke and type 2 diabetes according to Erikson et al 2016.

| <b>pathology</b> | <b>p-val</b> |
|------------------|--------------|
| alzheimer        | 0.997        |
| breast           | 0.997        |
| colon            | 0.997        |
| coronary         | 0.997        |
| lung             | 0.0681       |
| pancreatic       | 0.997        |
| prostate         | 0.11         |
| stroke           | 0.998        |
| type 2 diabetes  | 0.997        |
| ALL              | 0.998        |
